# Supplementary material for: Levels of DNA cytosine methylation in the Drosophila genome
Source: PeerJ. 2018 Jul 2;6:e5119. doi: 10.7717/peerj.5119 (PMC6033079; doi:10.7717/peerj.5119)
Supplement: Data S1 [file peerj-06-5119-s005.xlsx]

## Sheet: Supplementary1
Stages	Reading 1	Reading 2	Reading 3	Reading 4	Mean	Std Dev	Std. Error
Late embryos	0.038	0.0693	0.009	0.009	0.031325	0.0287719	0.014386
3rd instar larva	0.021	0.083	0.017		0.0403333	0.0370045	0.0213646
White pupa	0.0007	0.0009	0.002		0.0012	0.0007	0.000404145
Male pupa	0.0018	0.0013	0.003	0.0026	0.002175	0.000767572	0.000383786
Female pupa	0.0015	0.0011	0.002		0.00153333	0.000450925	0.000260342
1d Male adult	0.002	0.001	0.0022	0.001	0.00155	0.000640312	0.000320156
1d Female adult	0.001	0.001	0.002	0.002	0.0015	0.00057735	0.000288675
1d ork male head	0.014	0.0075	0.005		0.00883333	0.00464579	0.00268225

## Sheet: Supplementary2
Stage	Mean %5mC/C	No. of 5mC per genome copy
Late embryos	0.031325	8620.26
3rd instar larva	0.0403333	11086.8
White pupa	0.0012	359.528
Male pupa	0.002175	651.645
Female pupa	0.00153333	459.397
1d Male adult	0.00155	464.39
1d Female adult	0.0015	449.41
No. C in genome	29960672
From RELEASE 6 Flybase
Total sequence length	143726002
Total gap length	1152978
Total sequence nucleotides	142573024
Counting with perl script from RELEASE 6 fasta
A	41351058
T	41332481
G	29928813
C	29960672
Total	142573024
Stages	No. 5mC in genome/copy genome					Mean	Std Dev.	SEM
Late embryos	11385.1	20762.7	2696.46	2696.46		8620.26	9385.18	4310.13
3rd instar larva	24867.4	6291.74	5093.31			11086.8	12084.1	6400.97
White pupa	209.725	269.646	599.213			359.528	209.725	121.085
Male pupa	539.292	389.489	898.82	778.977		651.645	229.97	114.985
Female pupa	449.41	329.567	599.213			459.397	135.1	78.0001
1d Male adult	599.213	299.607	659.135	299.607		464.39	191.842	95.921
1d Female adult	299.607	299.607	599.213	599.213		449.41	172.978	86.489
Stages	No 5mC dinucleotides	Unmethylated C
Late embryos	9385.18	2.99513e+07
3rd instar larva	12084.1	2.99486e+07
White pupa	359.528	2.99603e+07
Male pupa	651.645	2.996e+07
Female pupa	459.397	2.99602e+07
1d Male adult	464.39	2.99602e+07
1d Female adult	449.41	2.99602e+07

## Sheet: Supplementary3
Species	Run 1	Run 2	Average dmC/dC %
D.simulans	0.051	0.052	0.0515
D.sechellia	0.011	0.01	0.0105
D.melanogaster	0.001	0.001	0.001
D.yakuba	0.051	0.052	0.0515
D.erecta	0.078	0.075	0.0765
D.ananassae	0.05	0.05	0.05
D.pseudoobscura	0.048	0.051	0.0495
D.persimilis	0.093	0.093	0.093
D.willistoni	0.056	0.054	0.055
D.mojavensis	0.051	0.052	0.0515
D.virilis	0.056	0.059	0.0575
D.grimshawi	0.068	0.068	0.068
Species	A	T	G	C	N	Total Length	umethylated C	5mC
D.melanogaster	41351058	41332481	29928813	29960672	1152978	143726002	2.99602e+07	464.39
D.sechellia	45466405	45588390	33115029	33068751	9338570	166577145	3.30653e+07	3472.22
D.pseudoobscura	40829834	40836311	33674064	33686910	3669265	152696384	3.36702e+07	16675
D.ananassae	62216348	61931138	44836162	44935169	17074195	230993012	4.49127e+07	22467.6
D.simulans	35537209	35540479	26765729	26744672	378363	124966452	2.67309e+07	13773.5
D.yakuba	46863900	46975797	34381230	34360947	3112072	165693946	3.43433e+07	17695.9
D.mojavensis	54646027	54417520	35557996	35586288	13618479	193826310	3.5568e+07	18326.9
D.willistoni	70183145	70140245	41632782	41653856	11906320	235516348	4.16309e+07	22909.6
D.virilis	56757487	56795352	37794450	37858574	16820834	206026697	3.78368e+07	21768.7
D.grimshawi	57738634	57680874	35308925	35362236	14377150	200467819	3.53382e+07	24046.3
D.erecta	41898635	41864933	30665312	30655139	7628121	152712140	3.06317e+07	23451.2
D.persimilis	48359323	48312802	39459116	39452315	12790523	188374079	3.94156e+07	36690.7
